# Supplementary material for: Radiation induces IRAK1 expression to promote radioresistance by suppressing autophagic cell death via decreasing the ubiquitination of PRDX1 in glioma cells
Source: PubMed Central journal article supplement (PMC10082800; doi:10.1038/s41419-023-05732-0), 2023-04-08

2a

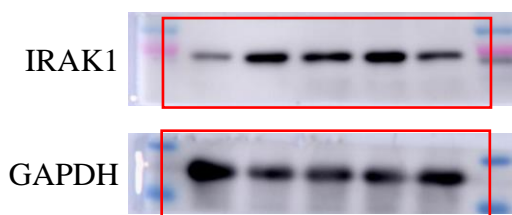

2f

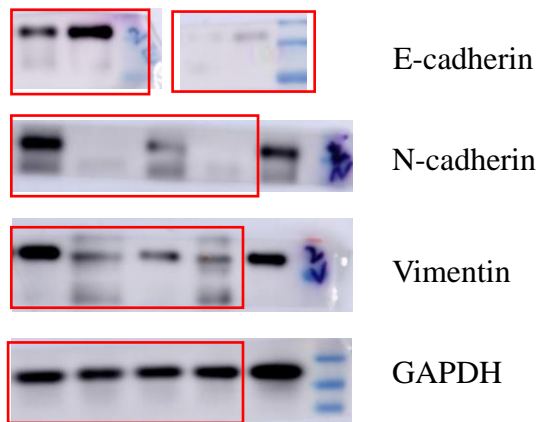

3a

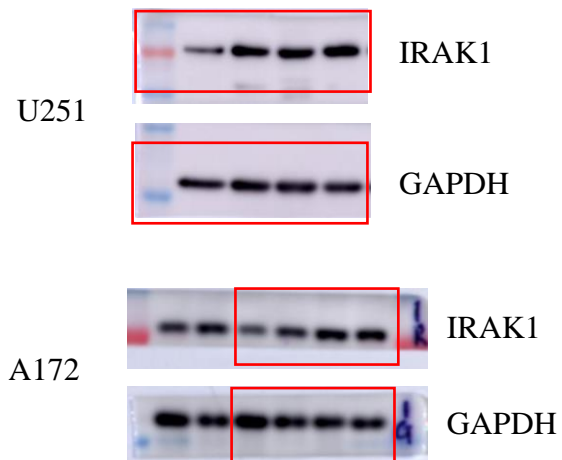

3g

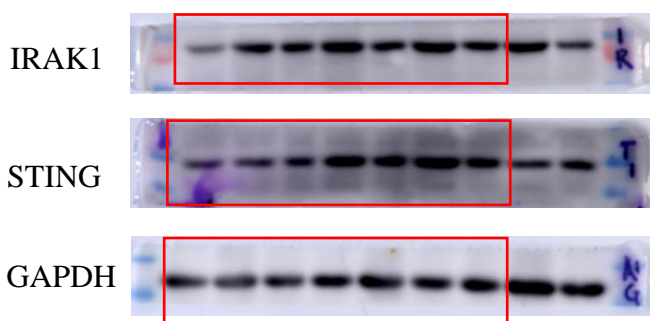

3j

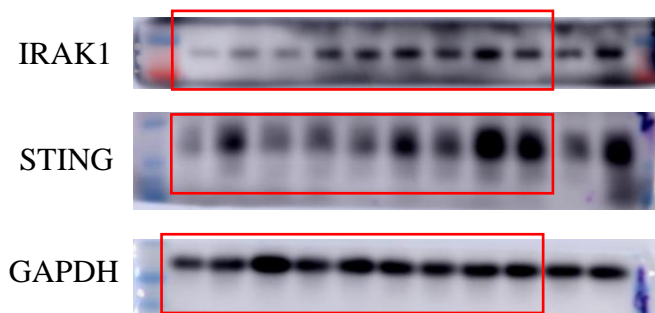

3l

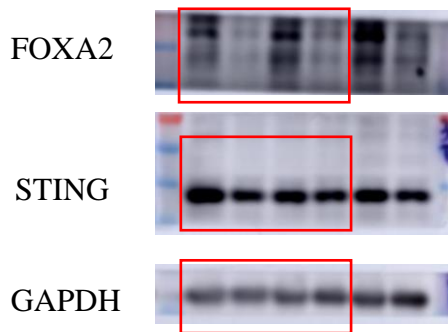

3n

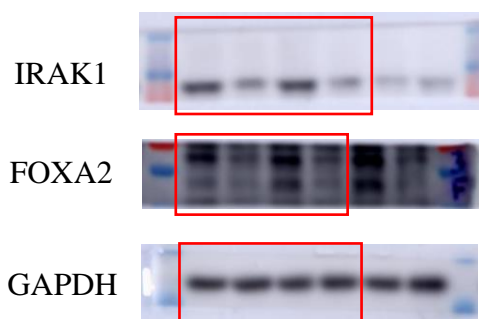

S1a

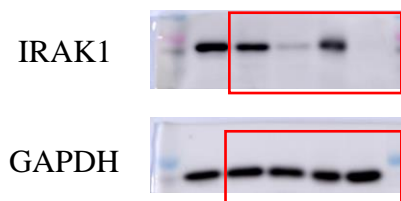

S1e

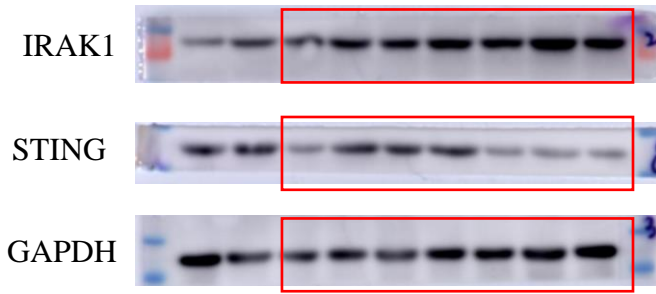

S1h

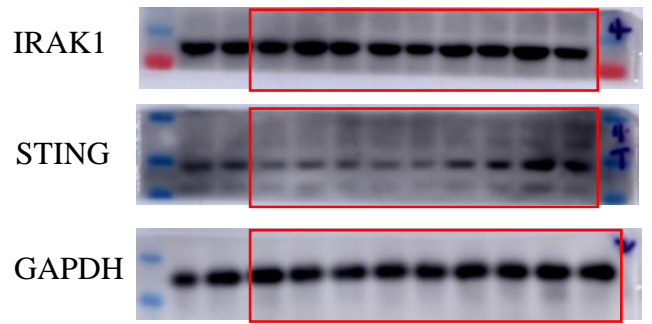

5b

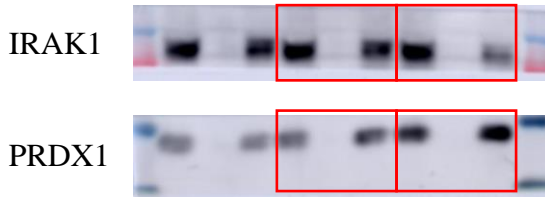

5c

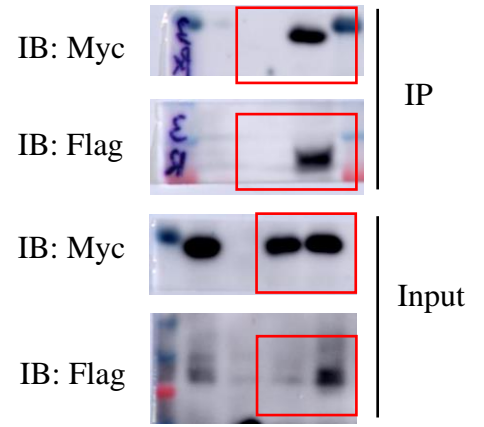

S2c

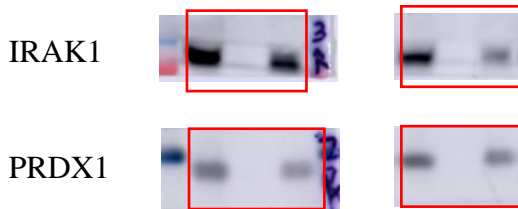

5f

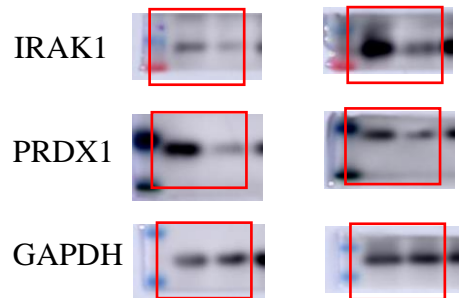

5e

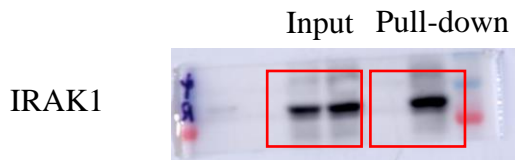

Coomassie blue

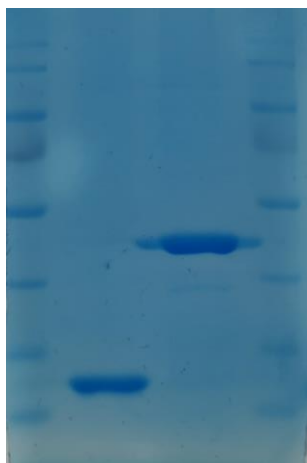

5g

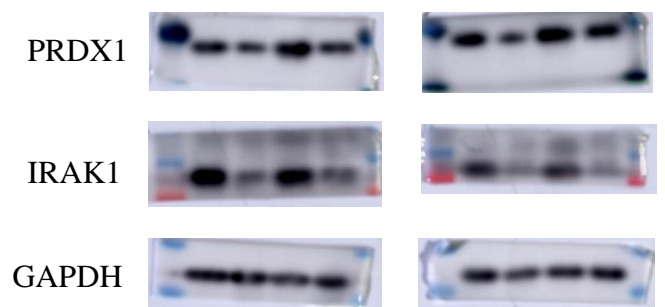

5h

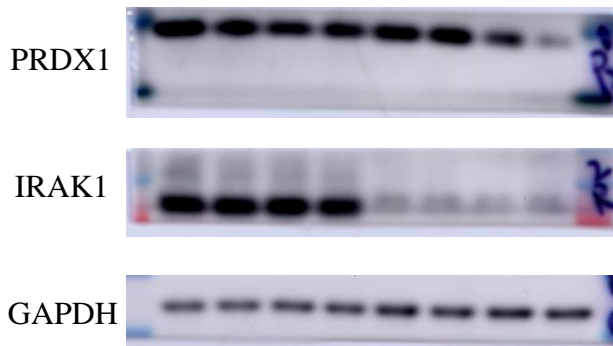

5i

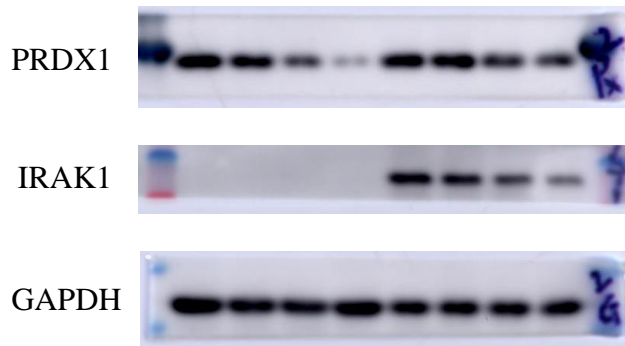

S2d

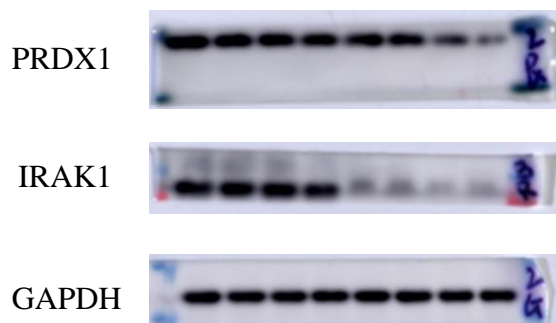

5k

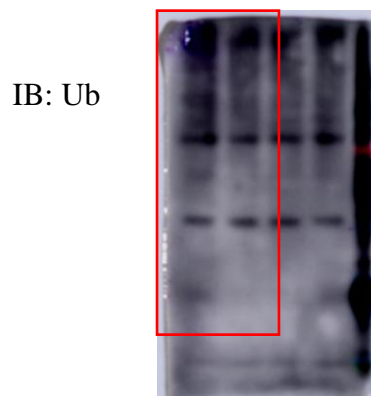

5j

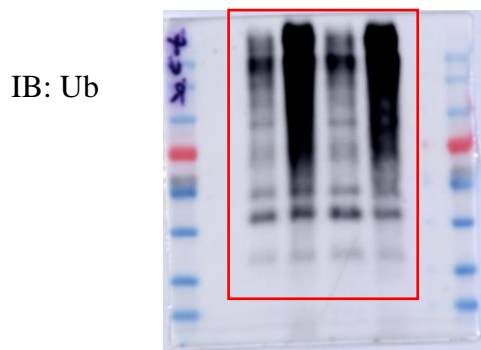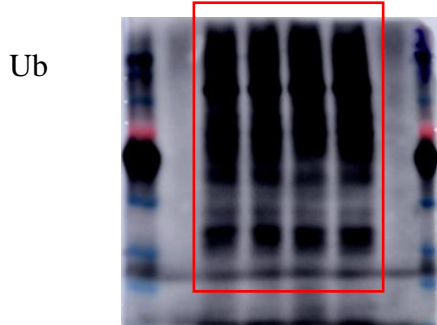

PRDX1

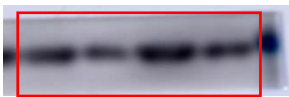

IRAK1

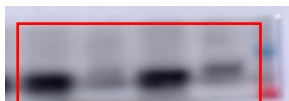

Lysates

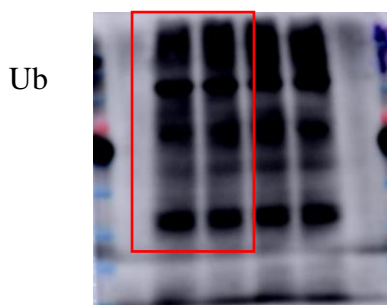

Myc

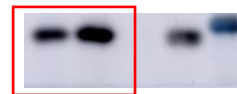

Flag

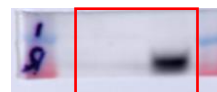

Lysates

5l

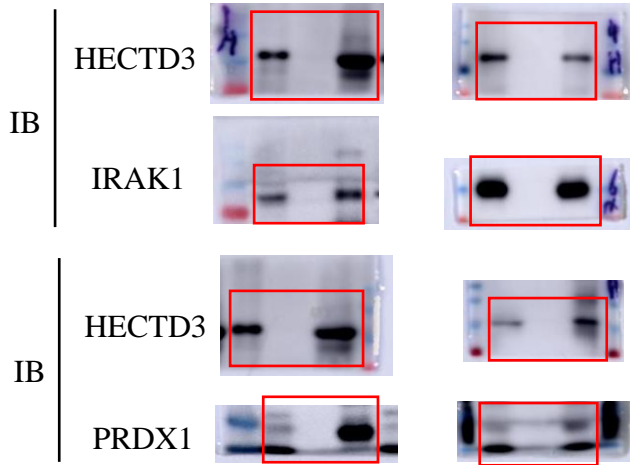

5m

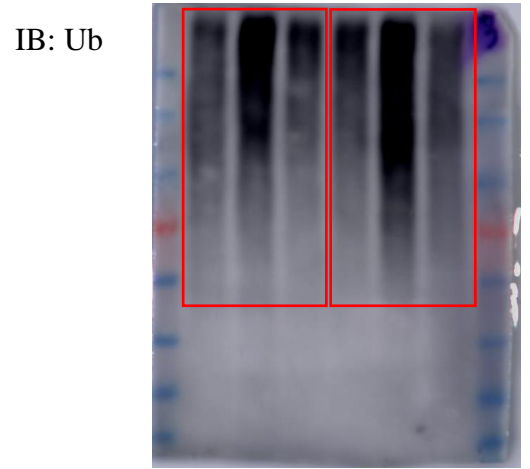

5o

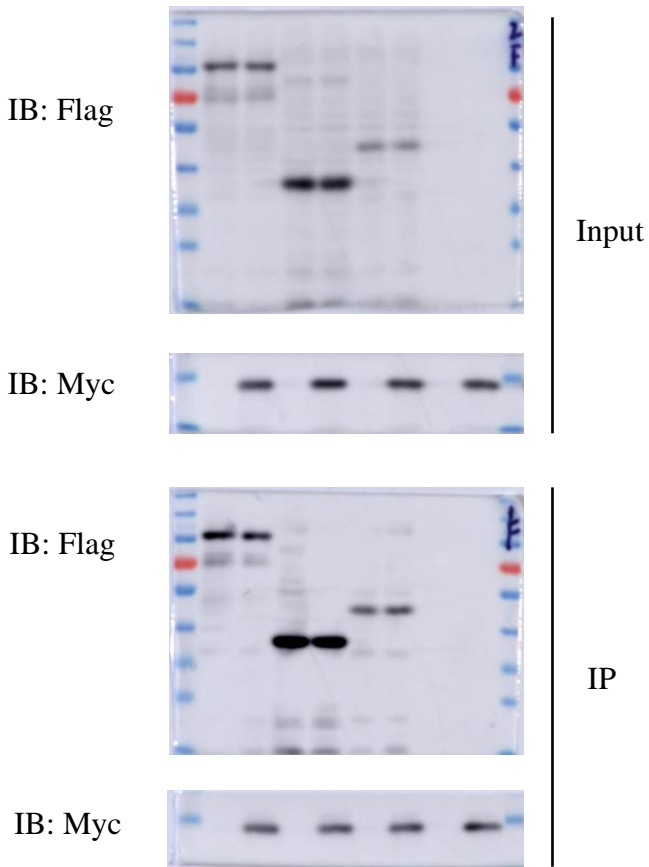

Lysates

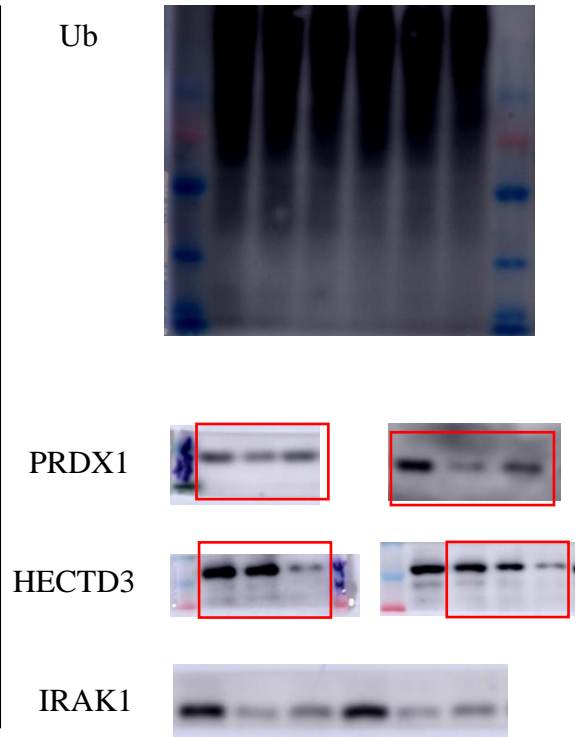

S3c

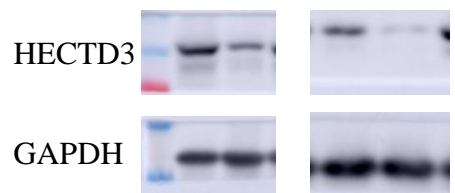

S3d

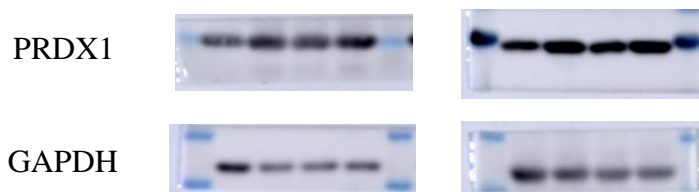

S3e

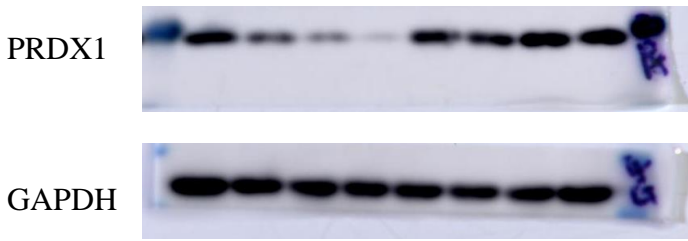

7a

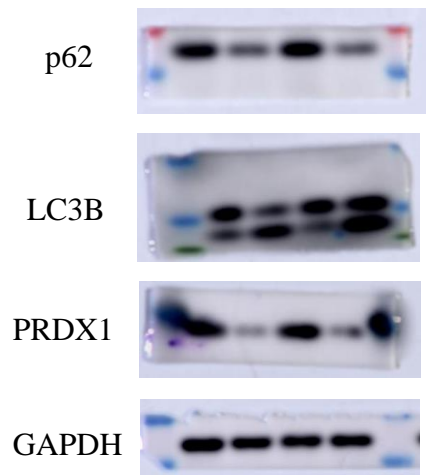

S3f

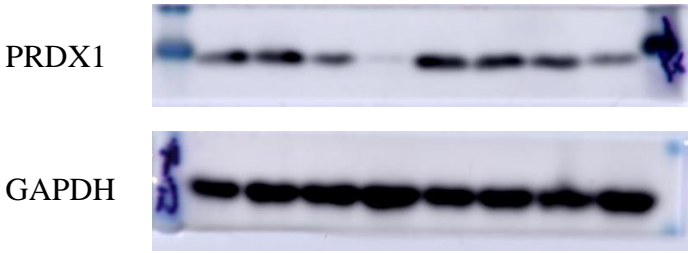

S5a

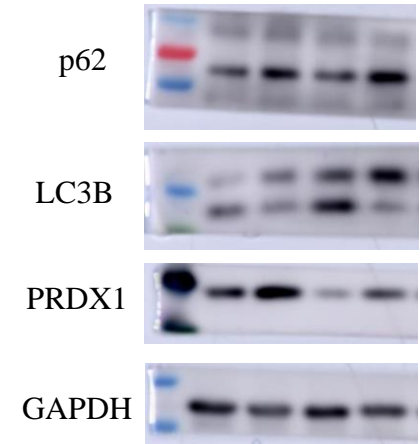

6a

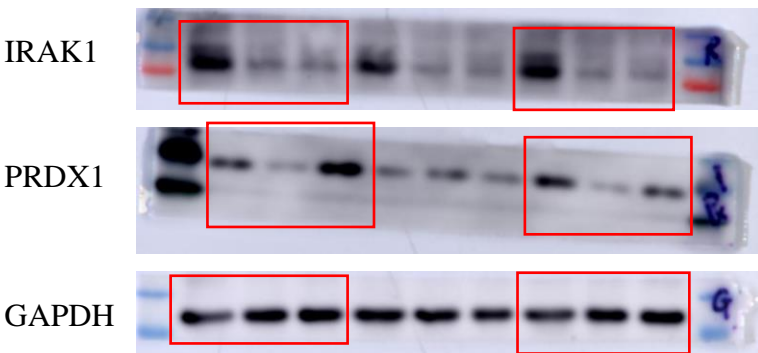

S5e

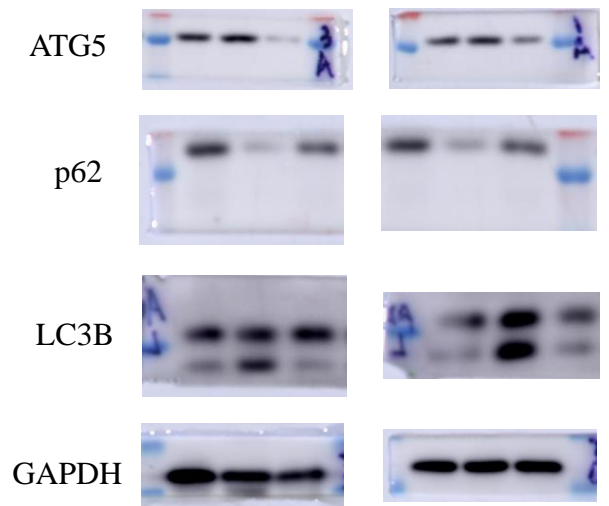

S5d

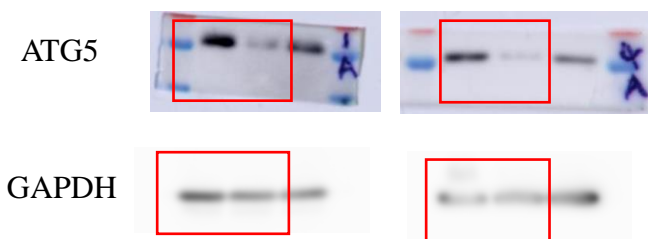

7c

S5g

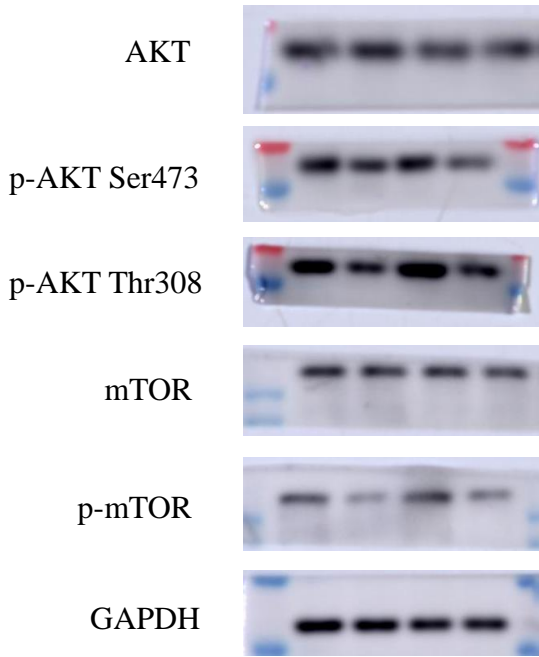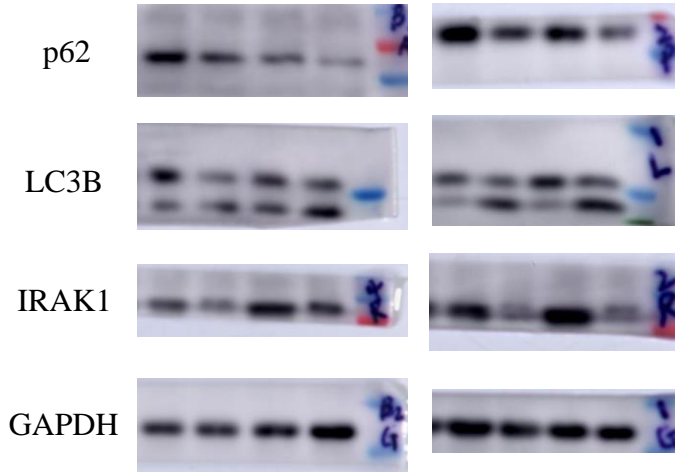

7g

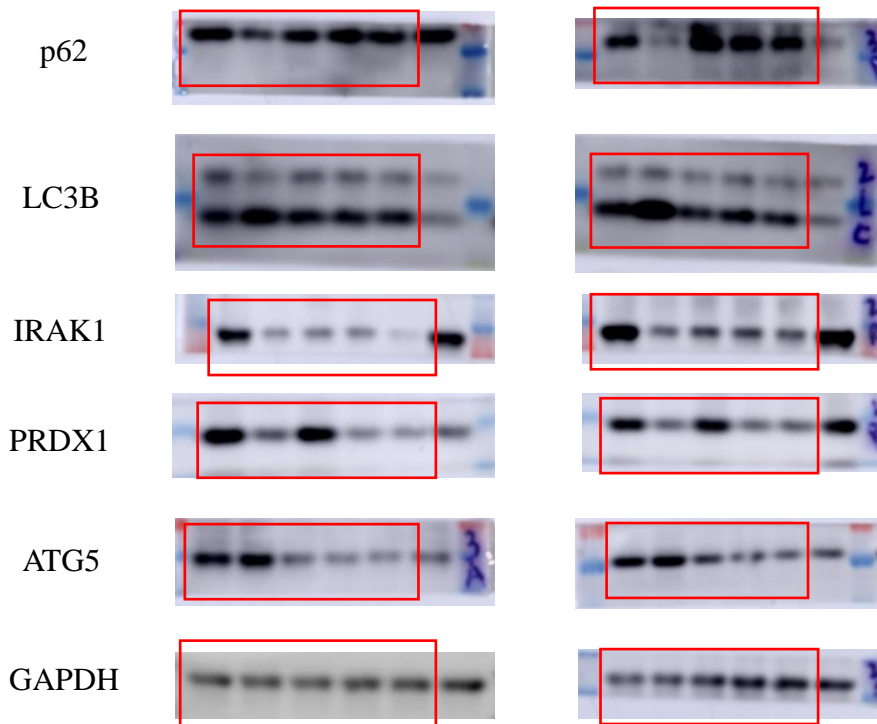

7h

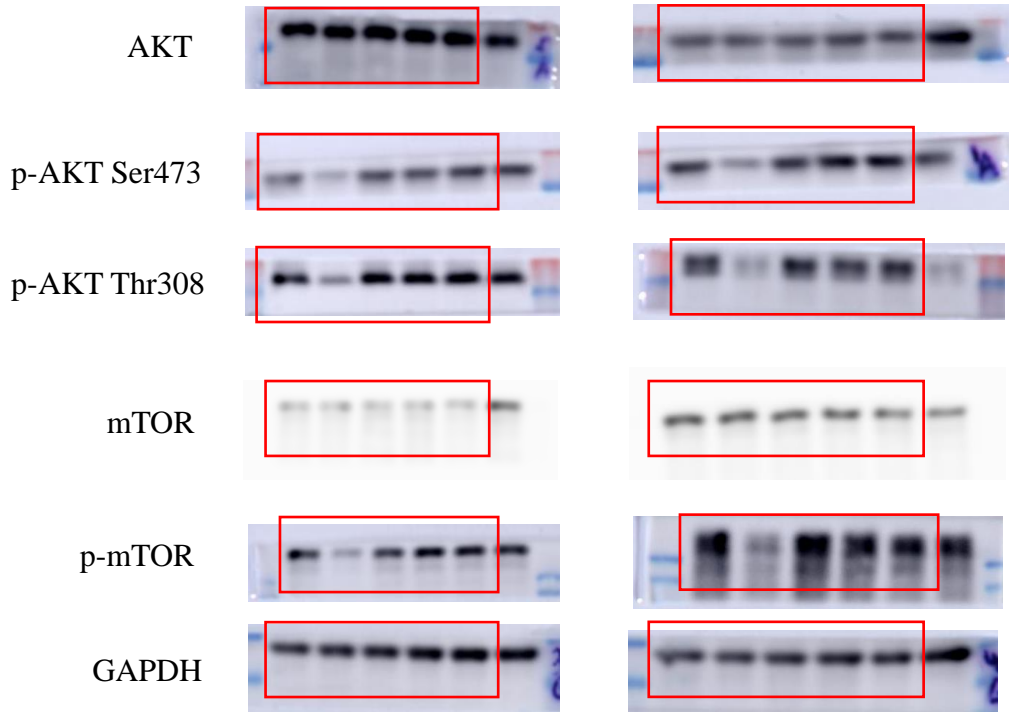

Supplement: 41419_2023_5732_MOESM2_ESM.pdf [file 41419_2023_5732_MOESM2_ESM.pdf]
