# Supplementary material for: Radiation induces IRAK1 expression to promote radioresistance by suppressing autophagic cell death via decreasing the ubiquitination of PRDX1 in glioma cells
Source: PubMed Central journal article supplement (PMC10082800; doi:10.1038/s41419-023-05732-0), 2023-04-08
Supplement: 41419_2023_5732_MOESM1_ESM.pdf [file 41419_2023_5732_MOESM1_ESM.pdf]

## Supplementary information

Radiation induces IRAK1 expression to promote radioresistance by suppressing autophagic cell death via decreasing the ubiquitination of PRDX1 in glioma cells

Jing Li et al.,

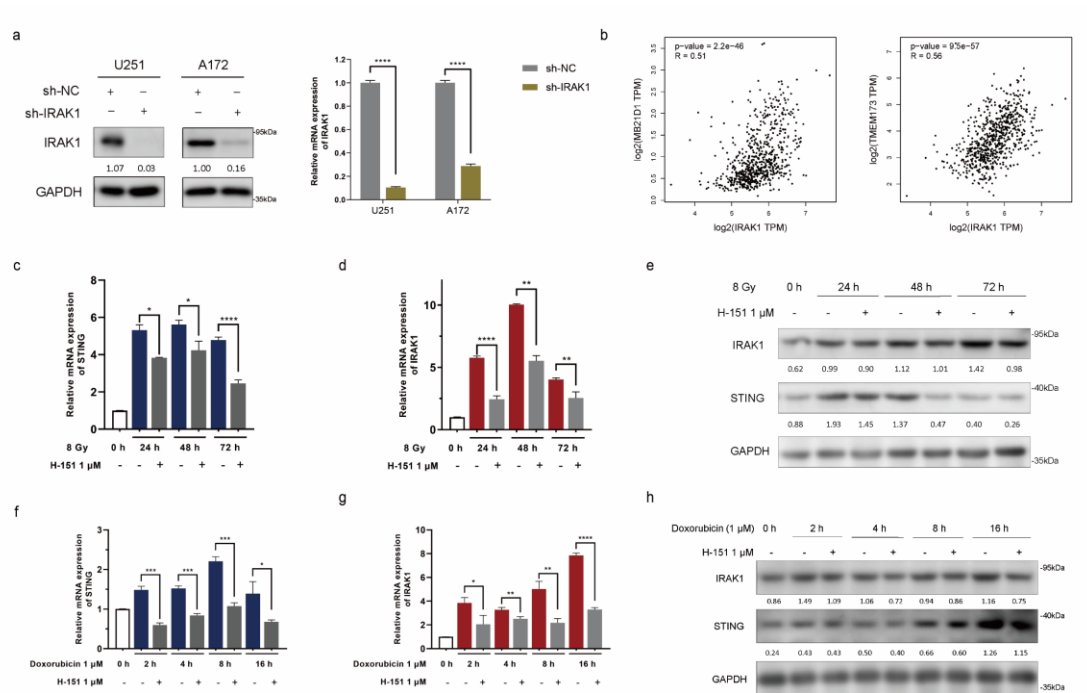

### Supplementary Fig. S1

**a** Western blotting and qRT-PCR analysis of U251 and A172 cells transduced with lentiviral sh-NC or sh-IRAK1. **b** The Spearman correlation coefficients for IRAK1 expression with cGAS (MB21D1) and STING (TMEM173) based on GBM tumor and LGG tumor from TCGA datasets. Analyses were conducted using the GEPIA2 webserver (<http://gepia2.cancer-pku.cn/#index>). **c, d** Analysis of the mRNA expression of STING (**c**) and IRAK1 (**d**) in A172 cells treated with 8 Gy IR ± H-151 (1 μM) by qRT-PCR. **e** Western blotting analysis to assess the protein expression of IRAK1 and STING in A172 cells at 0, 24, 48, and 72 h after 8 Gy IR with or without H-151 (1 μM) treatment. **f, g**

Analysis of the mRNA expression of STING (f) and IRAK1 (g) in A172 cells treated with doxorubicin (1  $\mu$ M)  $\pm$  H-151 (1  $\mu$ M) using qRT-PCR. h Effects of doxorubicin (1  $\mu$ M)  $\pm$  H-151 (1  $\mu$ M) treatment on IRAK1 and STING protein expression in A172 cells were evaluated by Western blotting. Data were presented as mean  $\pm$  SD from three independent experiments. \* $p$  < 0.05, \*\*  $p$  < 0.01, \*\*\*  $p$  < 0.001, \*\*\*\*  $p$  < 0.0001.

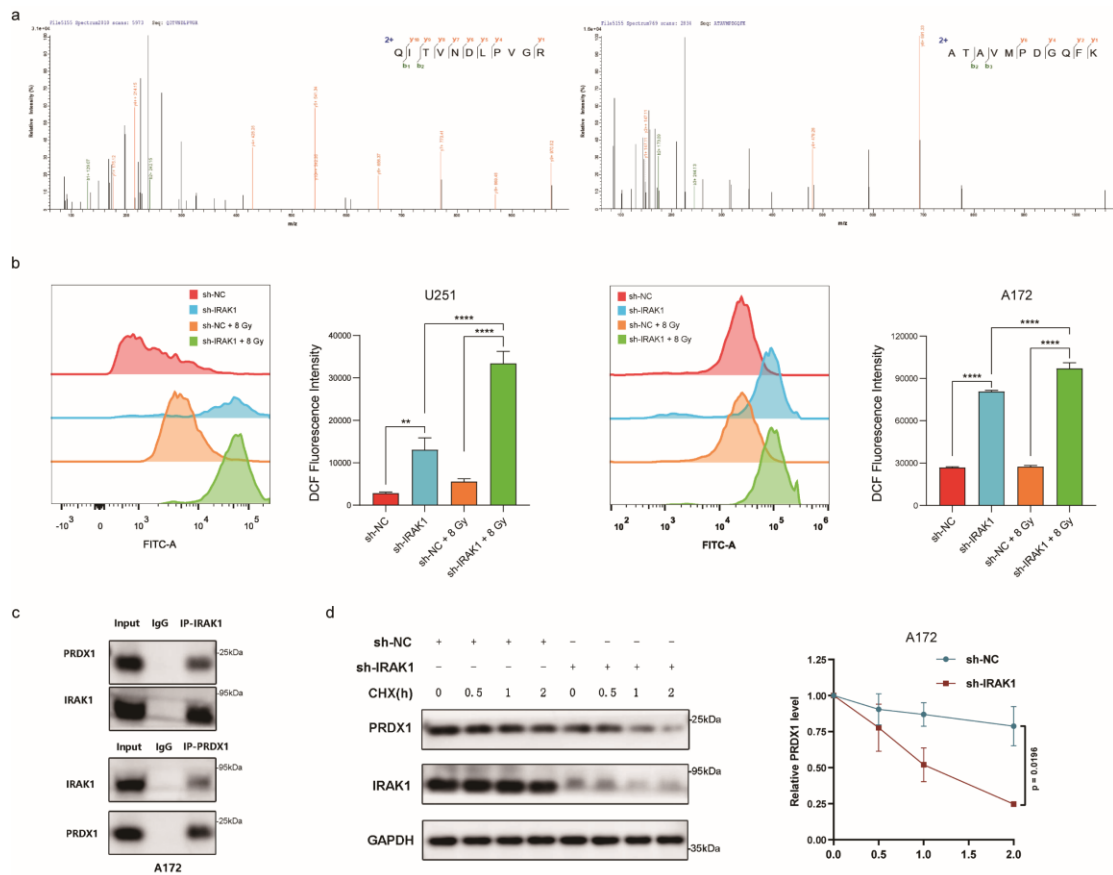

### Supplementary Fig. S2

**a** IRAK1 junction-specific peptides of PRDX1 were identified by IP combined with LC-MS/MS of anti-IRAK1 antibody in U251 cells. **b** Flow-cytometric analysis measured intracellular ROS levels in U251 and A172 cells after IRAK1 stably knockdown, followed by treatment with or without 8 Gy IR. **c** Co-IP detected the interaction of endogenous IRAK1 and PRDX1 in A172 cells. **d** The

effect of CHX treatment (100  $\mu\text{g}/\text{mL}$ ) and greyscale quantification analysis upon IRAK1 knockdown in A172 cells.

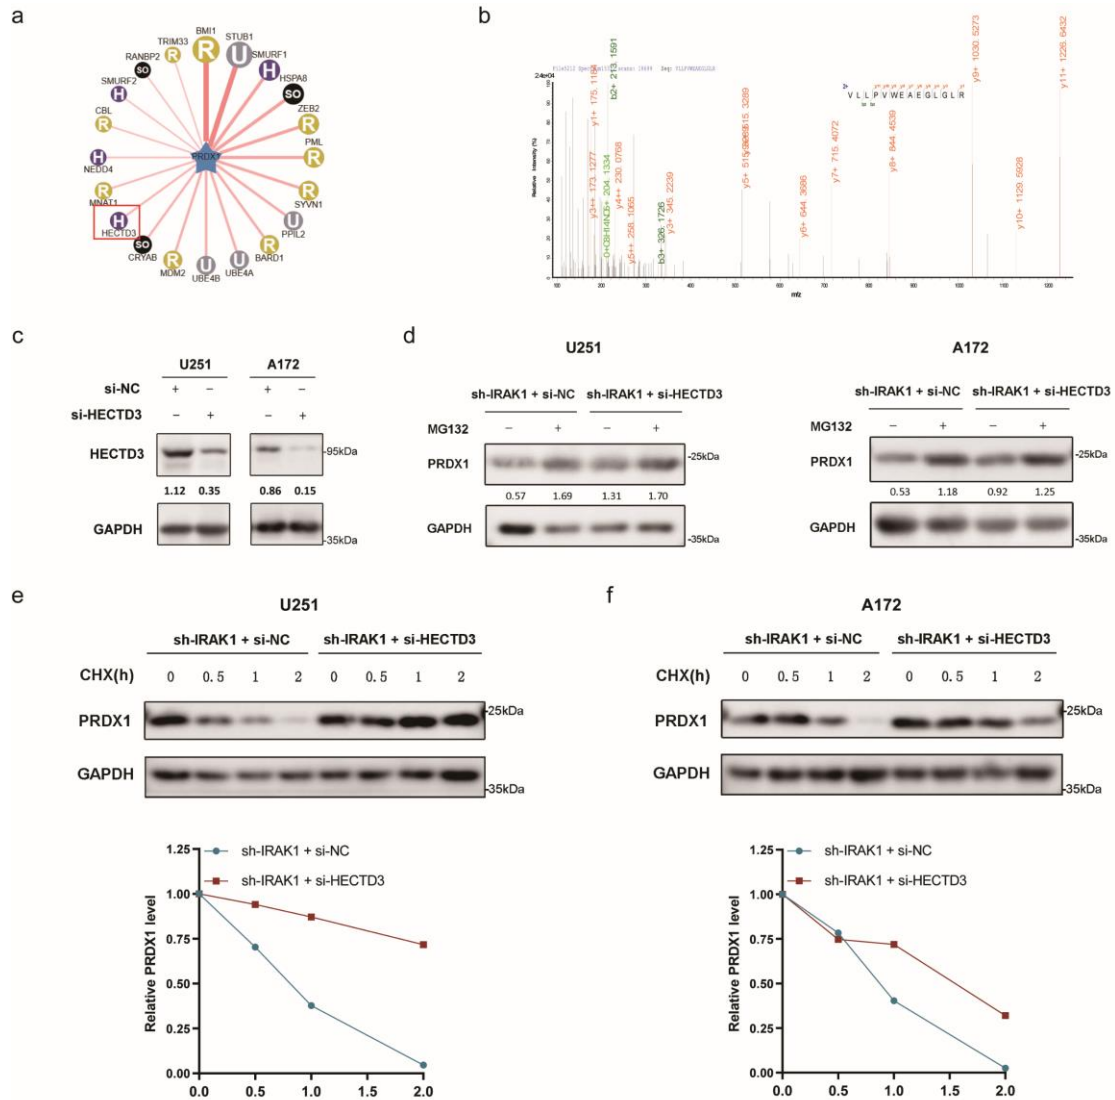

### Supplementary Fig. S3

**a** Prediction of PRDX1 associated E3 ubiquitin ligase by using UbiBrowser webserver. Red rectangle indicated the interested one. **b** Peptides of E3 ligase HECTD3 were identified by IP combined with LC-MS/MS pulled down by anti-IRAK1 antibody in U251 cells. **c** Western blotting assays of U251 and A172 cells transiently transfected with si-NC or si-HECTD3 plasmids. **d** Western blotting detecting the effects of MG132 treatment on the protein levels of PRDX1 in sh-IRAK1 + si-NC and sh-IRAK1 + si-HECTD3 groups. **e, f** Western blotting assays were conducted

to analyze the stability of PRDX1 protein after being treated with CHX (100  $\mu\text{g}/\text{mL}$ ) for the different duration in sh-IRAK1 + si-NC and sh-IRAK1 + si-HECTD3 groups of glioma cells.

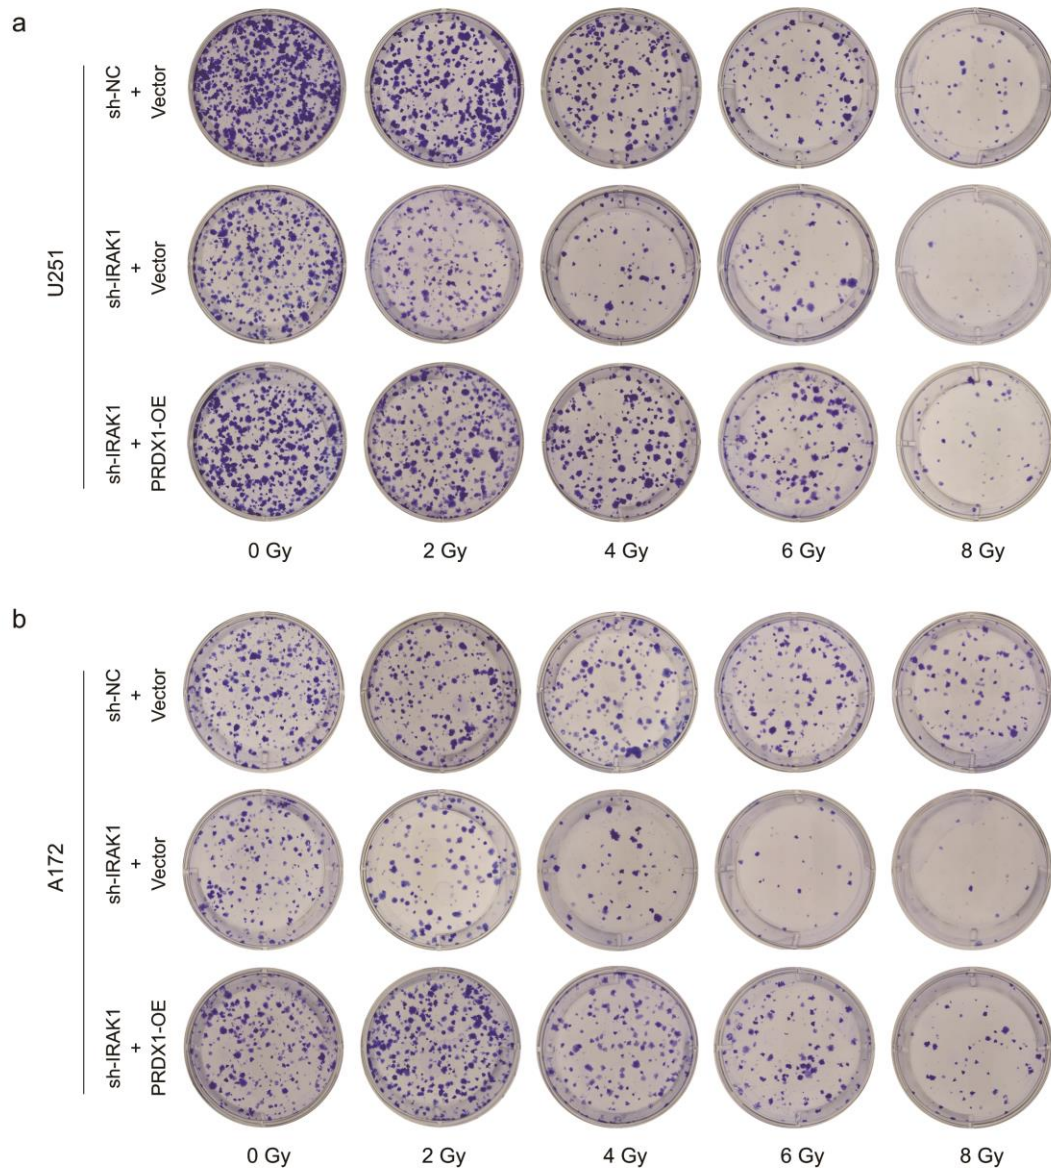

#### Supplementary Fig. S4

**a, b** Clone formation assays of sh-NC + Vector, sh-IRAK1 + Vector, and sh-IRAK1 + PRDX1 OE groups based on U251 (**a**) and A172 cells (**b**) following exposure to 0, 2, 4, 6, 8 Gy of X-rays.

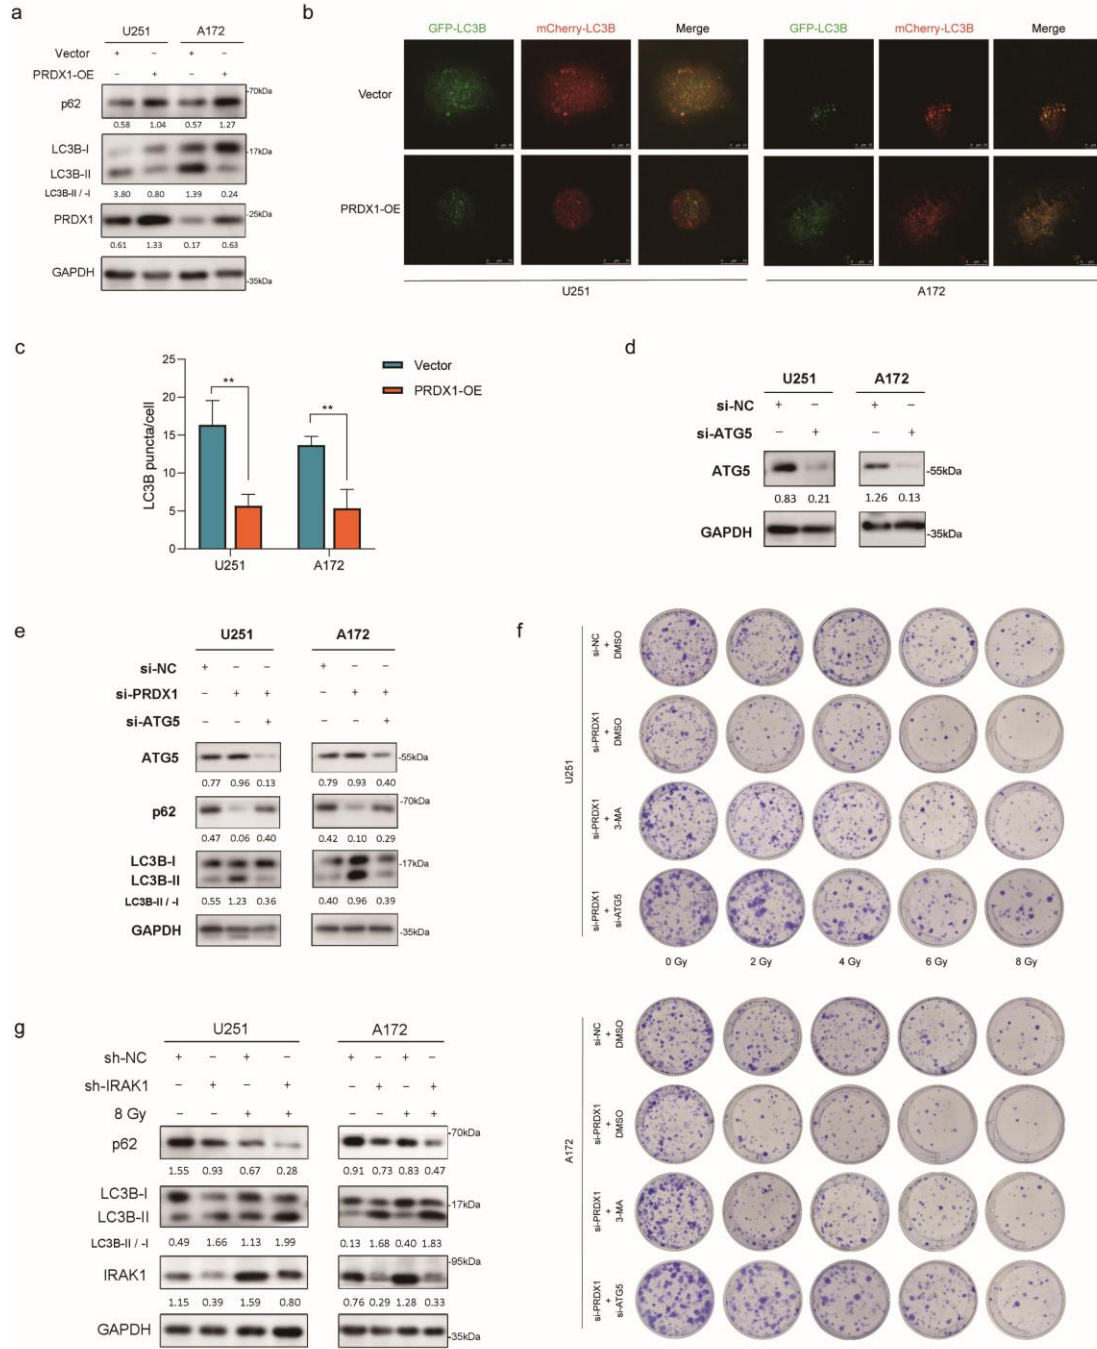

### Supplementary Fig. S5

**a** Western blotting detecting the protein levels of p62, LC3B, and PRDX1 in U251 and A172 cells with PRDX1 overexpression. **b, c** U251 and A172 cells with PRDX1 overexpression were transfected with mCherry-GFP-LC3B adenovirus for 48 h. Autophagic flux was measured by confocal microscopy (**b**), and the LC3B puncta was quantified (**c**). Scale bar, 10  $\mu$ m. Data were

presented as mean  $\pm$  SD from three repeats, \*\*  $p < 0.01$ . **d** The knockdown efficiency of si-ATG5 in U251 and A172 cells by Western blotting. **e** Western blotting assays detecting the changes of si-ATG5 on the protein levels of p62 and LC3B in PRDX1 silenced cells. **f** Representative images of clone formation assays of U251 and A172 cells transfected with si-PRDX1 with or without 3-MA (2.5 mM, 24 h) or si-ATG5 treatment before exposed to 0, 2, 4, 6, 8 Gy IR. **g** IRAK1 knockdown cells were accepted with 8 Gy IR. Western blotting assays were conducted to detect the protein levels of p62, LC3B, and IRAK1 in different groups. The LC3-II/LC3-I ratio was calculated based on densitometry analysis of both bands. The gray value ratios of other proteins/GAPDH were shown below each lane.

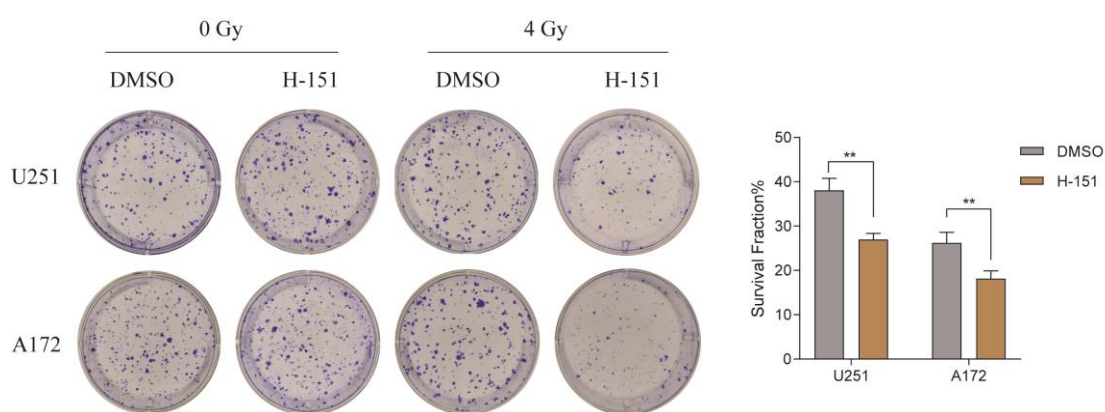

### Supplementary Fig. S6

Representative images and the corresponding survival fraction histogram of clone formation assays treated with H-151 (1  $\mu$ M) or DMSO before being exposed to 4 Gy IR in U251 and A172 cells.

**Supplementary Table S1.** Radiobiological parameters of IRAK1 knockdown cells and control cells.

|       | $D_0$             | $D_q$             | N                 | $SF_2$            |
|-------|-------------------|-------------------|-------------------|-------------------|
| U251  |                   |                   |                   |                   |
| sh-NC | $2.251 \pm 0.121$ | $1.311 \pm 0.054$ | $1.656 \pm 0.171$ | $0.568 \pm 0.016$ |

|             |                  |                 |               |                 |
|-------------|------------------|-----------------|---------------|-----------------|
| sh-IRAK1    | 1.360 ± 0.196 ** | 1.341 ± 0.154   | 2.925 ± 0.945 | 0.516 ± 0.017 * |
| <b>A172</b> |                  |                 |               |                 |
| sh-NC       | 1.998 ± 0.227    | 1.043 ± 0.133   | 1.454 ± 0.363 | 0.474 ± 0.037   |
| sh-IRAK1    | 1.586 ± 0.026 *  | 0.795 ± 0.060 * | 1.398 ± 0.096 | 0.372 ± 0.016 * |

**Supplementary Table S2.** The sequences of lentivirus or plasmids used in this study.

| Gene                   | Target sequences (5'-3') |
|------------------------|--------------------------|
| <b>shRNA sequences</b> |                          |
| sh-NC                  | TTCTCCGAACGTGTCACGT      |
| sh-IRAK1               | GCCACCGCAGATTATCATCAA    |
| <b>siRNA sequences</b> |                          |
| si-NC                  | UUCUCCGAACGUGUCACGUTT    |
| si-PRDX1               | ACUCAACUGCCAAGUGAUUTT    |
| si-HECTD3              | GCGGGAAGTGGGTTGAAT       |
| si-ATG5                | CCAUCAAUCCGAAACUCAUTT    |
| si-FOXA2               | GAACGGCATGAACACGTACAT    |

**Supplementary Table S3.** List of primers used in this study.

| Primers' name                | Sequence (5'-3') |                         |
|------------------------------|------------------|-------------------------|
| <b>Primers for qRT-PCR</b>   |                  |                         |
| IRAK1                        | Forward          | TCAGCTTTGGGGTGGTAGTG    |
|                              | Reverse          | TAGATCTGCATGGCGATGGG    |
| PRDX1                        | Forward          | CTGCCAAGTGATTGGTGCTTCTG |
|                              | Reverse          | AATGGTGCGCTTCGGGTCTGAT  |
| cGAS                         | Forward          | AAGGATAGCCGCCATGTTTCT   |
|                              | Reverse          | TGGCTTTCAGCAAAAGTTAGG   |
| TMEM173/STING                | Forward          | AGCATTACAACAACCTGCTACG  |
|                              | Reverse          | GTTGGGGTCAGCCATACTCAG   |
| GAPDH                        | Forward          | GAAGAGAGAGACCCTCACGCTG  |
|                              | Reverse          | ACTGTGAGGAGGGGAGATTCAGT |
| <b>Primers for CHIP-qPCR</b> |                  |                         |
| IRAK1-P1                     | Forward          | AAACCTGTCTGAATGTACCTGT  |
|                              | Reverse          | TGCTGCCCATCTTTTCCAAT    |
| IRAK1-P2                     | Forward          | TGGCTCCTCCTGTGTCTCAT    |
|                              | Reverse          | TTGCCTGGTCAGAGAACCAC    |
| IRAK1-P3                     | Forward          | GAGTAAGTCTGCGTTGCTGC    |
|                              | Reverse          | CCTGGGCATCGTCCTTGATT    |

**Supplementary Table S4.** List of antibodies used in the study.

| <b>Antibody</b>                                               | <b>Company</b> | <b>Catalog no.</b> | <b>Dilution</b> |
|---------------------------------------------------------------|----------------|--------------------|-----------------|
| <b>Western blot</b>                                           |                |                    |                 |
| GAPDH antibody, Rabbit Polyclonal                             | Proteintech    | 10494-1-AP         | 1:10000         |
| IRAK1 antibody, Rabbit Polyclonal                             | Proteintech    | 10478-2-AP         | 1:1000          |
| IRAK1 antibody, Rabbit Monoclonal                             | CST            | 4504S              | 1:1000          |
| E-cadherin antibody, Rabbit Polyclonal                        | Proteintech    | 20874-1-AP         | 1:5000          |
| N-cadherin antibody, Rabbit Polyclonal                        | Proteintech    | 22018-1-AP         | 1:2000          |
| Vimentin antibody, Rabbit Polyclonal                          | Proteintech    | 10366-1-AP         | 1:1000          |
| TMEM173/STING antibody, Rabbit Polyclonal                     | Proteintech    | 19851-1-AP         | 1:1000          |
| PRDX1 antibody, Rabbit Polyclonal                             | Proteintech    | 15816-1-AP         | 1:1000          |
| GST Tag antibody, Rabbit Polyclonal                           | Proteintech    | 10000-0-AP         | 1:1000          |
| Ubiquitin antibody, Rabbit Polyclonal                         | Proteintech    | 10201-2-AP         | 1:500           |
| HECTD3 antibody, Rabbit Polyclonal                            | Proteintech    | 11487-1-AP         | 1:2000          |
| LC3B antibody, Rabbit Polyclonal                              | Proteintech    | 18725-1-AP         | 1:1000          |
| Anti-SQSTM1/p62 antibody, Rabbit Monoclonal                   | Abcam          | ab109012           | 1:2000          |
| AKT antibody, Rabbit Polyclonal                               | Proteintech    | 10176-2-AP         | 1:1000          |
| Phospho-AKT (Ser473) antibody, Rabbit Polyclonal              | Proteintech    | 28731-1-AP         | 1:1000          |
| Phospho-AKT (Thr308) antibody, Rabbit Polyclonal              | Proteintech    | 29163-1-AP         | 1:2000          |
| mTOR (7C10) antibody, Rabbit Monoclonal                       | CST            | 2983S              | 1:1000          |
| Phospho-mTOR (Ser2448) (D9C2) XP® antibody, Rabbit Monoclonal | CST            | 5536S              | 1:1000          |
| DYKDDDDK (FLAG) Tag antibody, Rabbit Polyclonal               | Proteintech    | 20543-1-AP         | 1:2000          |
| HRP-labeled Goat Anti-Rabbit IgG (H+L) antibody               | Beyotime       | A0208              | 1:2000          |
| HRP-labeled Goat Anti-Mouse IgG (H+L) antibody                | Beyotime       | A0216              | 1:1000          |
| Anti-FOXA2 antibody-ChIP Grade, Rabbit Monoclonal             | Abcam          | ab108396           | 1:500           |
| ATG5 antibody, Rabbit Polyclonal                              | Proteintech    | 10181-2-AP         | 1:2000          |
| <b>Immunofluorescence</b>                                     |                |                    |                 |
| IRAK1 antibody, Mouse Monoclonal                              | Proteintech    | 66653-1-Ig         | 1:100           |
| PRDX1 antibody, Rabbit Polyclonal                             | Proteintech    | 15816-1-AP         | 1:150           |
| IRAK1 antibody, Rabbit Polyclonal                             | Proteintech    | 10478-2-AP         | 1:200           |
| cGAS antibody, Rabbit Polyclonal                              | Proteintech    | 26416-1-AP         | 1:100           |



|                                                            |              |            |       |
|------------------------------------------------------------|--------------|------------|-------|
| TMEM173/STING antibody, Rabbit Polyclonal                  | Proteintech  | 19851-1-AP | 1:200 |
| Phospho-Histone H2A.X (Ser139) (20E3) antibody, Rabbit mAb | CST          | 9718S      | 1:400 |
| Goat Anti-Rabbit IgG, Cy3 Conjugated secondary antibody    | zhuangzhibio | EK022      | 1:100 |
| Goat Anti-Mouse IgG, Cy3 Conjugated secondary antibody     | zhuangzhibio | EK012      | 1:100 |
| Goat Anti-Rabbit IgG, FITC Conjugated secondary antibody   | zhuangzhibio | EK023      | 1:100 |

### Co-Immunoprecipitation

|                                          |             |            |       |
|------------------------------------------|-------------|------------|-------|
| Normal Rabbit IgG                        | CST         | 2729S      | 1:100 |
| IRAK1 antibody, Rabbit Monoclonal        | CST         | 4504S      | 5 µg  |
| PRDX1 antibody, Rabbit Polyclonal        | Proteintech | 15816-1-AP | 5 µg  |
| HECTD3 antibody, Rabbit Polyclonal       | Proteintech | 11487-1-AP | 5 µg  |
| MYC Tag antibody, Rabbit Polyclonal      | Proteintech | 16286-1-AP | 3 µg  |
| Anti-FLAG® M2 antibody produced in mouse | Sigma       | F1804      | 3 µg  |

### Chromatin Immunoprecipitation (ChIP)

|                                                   |       |          |        |
|---------------------------------------------------|-------|----------|--------|
| Anti-FOXA2 antibody-ChIP Grade, Rabbit Monoclonal | Abcam | ab108396 | 1.5 µg |
| Normal Rabbit IgG                                 | CST   | 2729S    | 1.5 µg |

### Immunohistochemistry

|                                        |             |            |         |
|----------------------------------------|-------------|------------|---------|
| IRAK1 antibody, Rabbit Polyclonal      | Proteintech | 10478-2-AP | 1:600   |
| PRDX1 antibody, Rabbit Polyclonal      | Proteintech | 15816-1-AP | 1:200   |
| LC3B antibody, Rabbit Polyclonal       | Proteintech | 18725-1-AP | 1:400   |
| SQSTM1/p62 antibody, Rabbit Polyclonal | Proteintech | 18420-1-AP | 1:100   |
| Ki67 antibody, Rabbit Polyclonal       | Proteintech | 27309-1-AP | 1:10000 |

---
